# Supplementary material
Source: PubMed Central journal article supplement (PMC4076143)
Supplement: NIHMS589465-supplement-SuppInfo.pdf [file NIHMS589465-supplement-SuppInfo.pdf]

## Supplementary Information

### Role of Sirtuins in Lifespan Regulation is Linked to Methylation of Nicotinamide

Kathrin Schmeisser\*, Johannes Mansfeld\*, Doreen Kuhlow, Sandra Weimer, Steffen Priebe, Ines Heiland, Marc Birringer, Marco Groth, Alexandra Segref, Yariv Kanfi, Nathan L. Price, Sebastian Schmeisser, Stefan Schuster, Andreas Pfeiffer, Reinhard Guthke, Matthias Platzer, Thorsten Hoppe, Haim Y. Cohen, Kim Zarse, David A. Sinclair, Michael Ristow

\* These authors contributed equally to the data presented.

### Table of Content

Page 2: Supplementary Figure 1 – Effects of different high-dose supplements on *C.elegans* lifespan

P. 3: Supplementary Figure 2 – Overexpressing 1-nicotinamide-methyltransferase/ANMT-1

P. 5: Supplementary Figure 3: Effects of aldehyde oxidase/GAD-3 products and an inhibitor on *C.elegans* lifespan

P. 6: Supplementary Figure 4: ROS production and effects of nicotinic acid (NA) and its metabolites in presence and absence of N-acetyl-cysteine (NAC) and butylated hydroxyanisole (BHA)

P. 8: Supplementary Figure 5: Transcriptome analyses identify DAF-16/FOXO and SKN-1/NRF-2 signaling as molecular pathways for MNA-mediated lifespan extension

P. 10: Supplementary Figure 6: Additional findings on downstream signaling and parameters of stress resistance

P. 11: Supplementary Table 1: Results and statistical analyses of *C. elegans* lifespan assays

P. 13: Supplementary Table 2: Selection of functional categories affiliated with MNA-upregulated genes

## Supplementary Figure 1

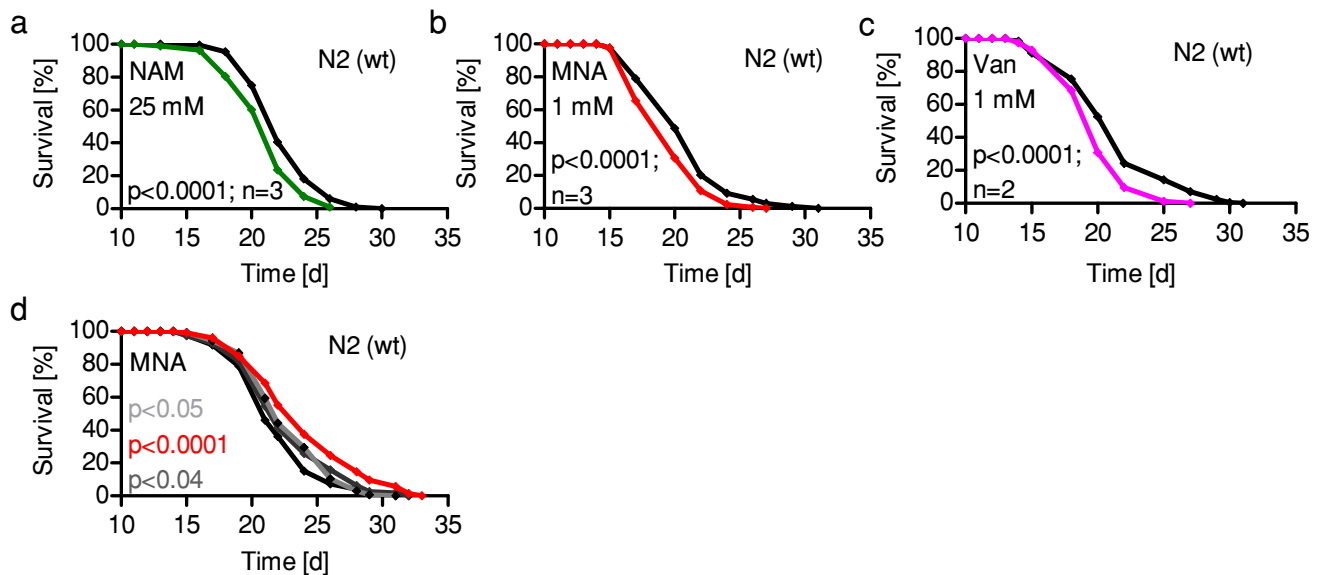

**Suppl. Fig. 1: Effects of different high-dose supplements on *C. elegans* lifespan**

**a** Lifespan analyses of wildtype (wt) nematodes exposed to 25 mM nicotinamide (green) compared with untreated worms (black). **b** Lifespan analyses of wt nematodes exposed to 1 mM 1-methylnicotinamide (MNA, red). **c** Lifespan analyses of wt nematodes exposed to 1 mM vanillin (pink). **d** Lifespan analyses of wt nematodes exposed to 0.1  $\mu$ M MNA (light grey,  $n=3$ ), 1  $\mu$ M MNA (red,  $n=6$ ), and 10  $\mu$ M MNA (dark grey,  $n=3$ ).

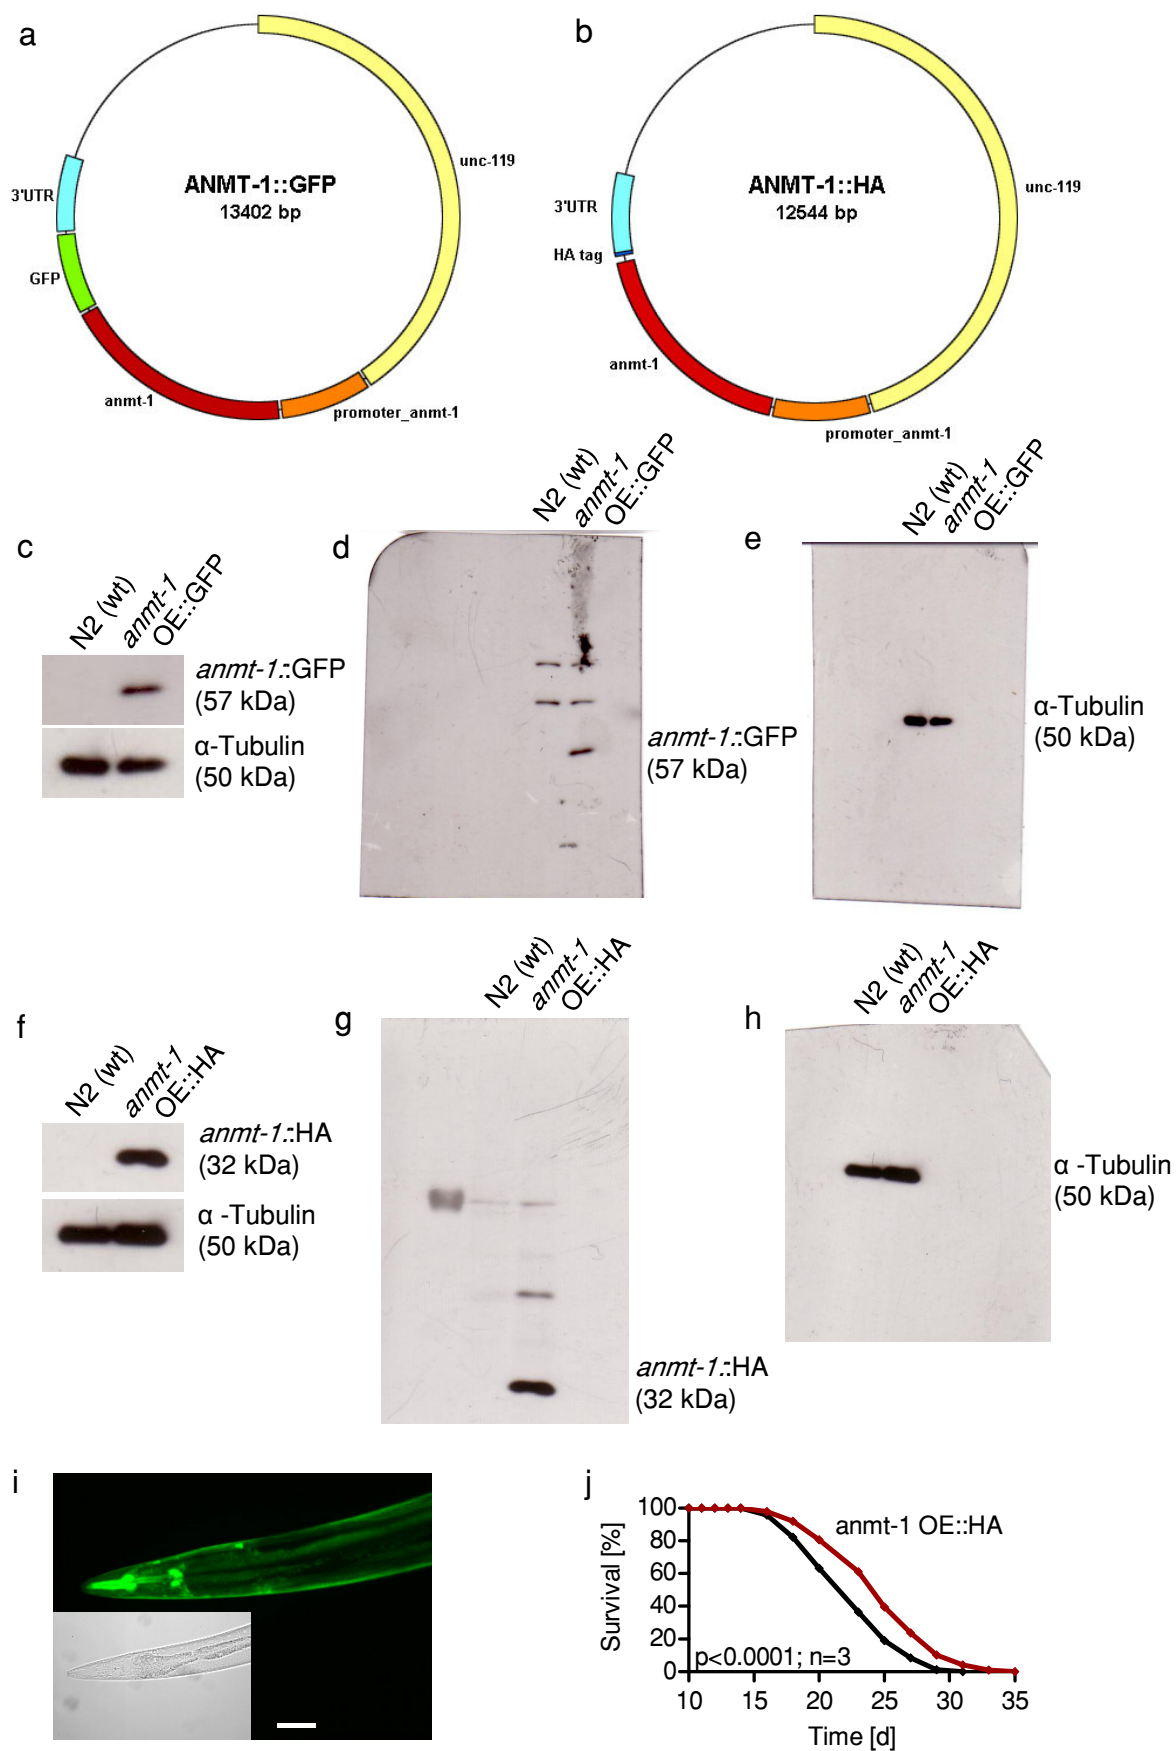

**Suppl. Fig. 2: Overexpressing 1-nicotinamide-methyltransferase/ANMT-1**

**a** Plasmid with GFP marker. **b** Plasmid with hemagglutinin (HA) marker. Plasmid maps were generated with Plasm V 2.0.4.29. **c – e** Immunoblotting against GFP in wild-type (wt) nematodes and overexpressors of *anmt-1* with a C-terminally fused GFP tag (*anmt-1* OE::GFP). **f – h** Immunoblotting against hemagglutinin in wt nematodes and overexpressors of *anmt-1* with a C-terminally fused HA tag (*anmt-1* OE::HA). Immunoblotting against  $\alpha$ -tubulin was used to normalize protein amount. **i** Expression pattern of GFP as a fused surrogate marker of ANMT-1 protein expression in the head of *anmt-1* OE::GFP nematodes. Scale bar, 50  $\mu$ m. **j** Lifespan analyses of *anmt-1* OE::HA (dark red) compared with wt nematodes (black).

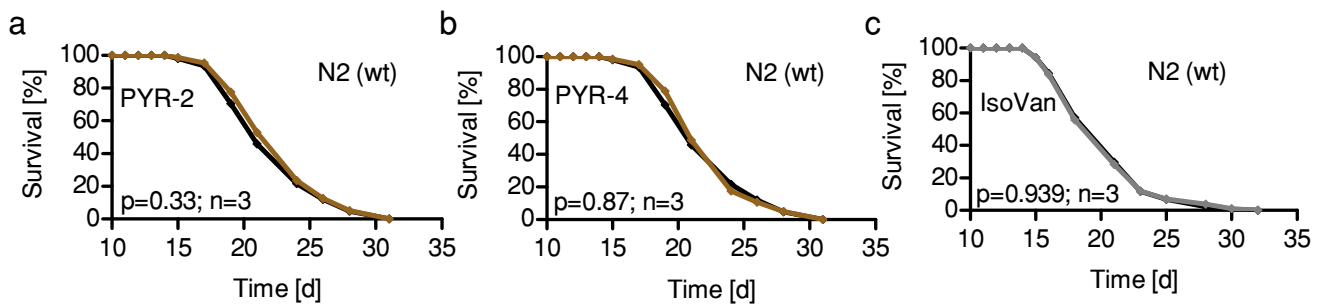

**Suppl. Fig. 3: Effects of aldehyde oxidase/GAD-3 products and an inhibitor on *C. elegans* lifespan**  
**a** Lifespan analyses of wild-type (wt) nematodes exposed to 1  $\mu$ M of the 1-methylnicotinamide (MNA) metabolite 1-methyl-2-pyridone-5-carboxamide (PYR-2; brown). **b** Lifespan analyses of wt nematodes exposed to 1  $\mu$ M of the MNA metabolite 1-methyl-4-pyridone-5-carboxamide (PYR-4; brown). **c** Lifespan analyses of wt nematodes exposed to 1  $\mu$ M of the AOX1/GAD-3 inhibitor iso-vanillin (IsoVan; grey).

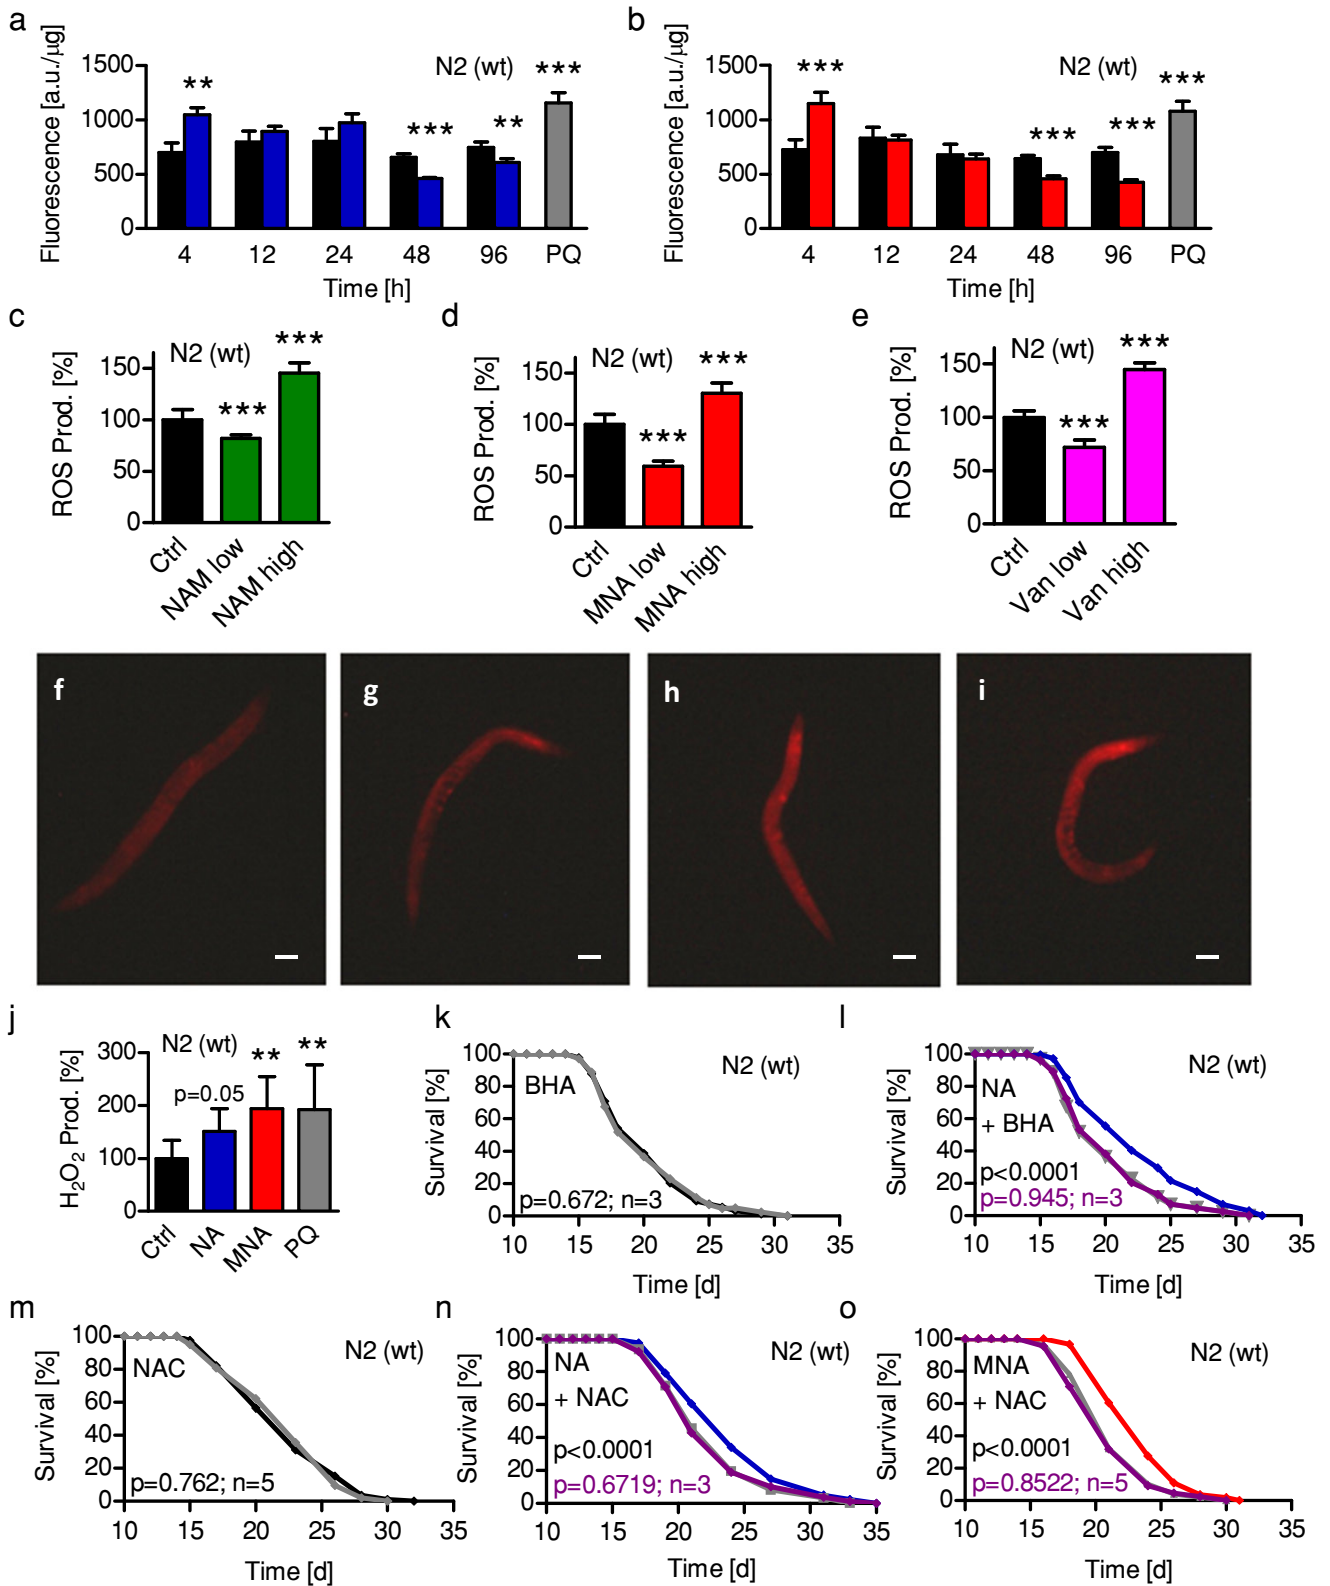

**Suppl. Fig. 4: ROS production and effects of nicotinic acid (NA) and its metabolites in presence and absence of N-acetyl-cysteine (NAC) and butylated hydroxyanisole (BHA)**

**a** ROS levels following 1 mM NA (blue bars) exposure compared with untreated wild-type (wt) nematodes (black bars) at different time points (absolute fluorescence). **b** ROS levels following 1  $\mu$ M 1-methylnicotinamide (MNA; red bars) exposure. **c** ROS levels in wt nematodes following 96 hrs exposure to 100  $\mu$ M nicotinamide (NAM low) and 25 mM NAM (NAM high; green bars). **d** ROS levels in wt nematodes following 96 hrs exposure to 1  $\mu$ M MNA (MNA low) and 1 mM MNA (MNA high; red bars). **e** ROS levels in wt nematodes following 7 days exposure to 1  $\mu$ M vanillin (Van low) and 1 mM vanillin (Van high; pink bars). **f** Fluorescent microphotographs of MitoTracker Red CM-H2X-treated wt nematodes **f** after 4 hr on control plates, **g** after 4 hr exposed to NA, **h** after 4 hr exposed to MNA and **i** after 1 hr PQ treatment. Scale bar, 100  $\mu$ m. **j**  $H_2O_2$  production following 4 hrs exposure to 1 mM NA and 1  $\mu$ M MNA. Data represent mean values with standard deviation of at least 2 independent experiments. **k** Lifespan analyses of wt nematodes exposed to 10  $\mu$ M BHA (grey) compared with untreated worms (black). **l** Lifespan analyses of wt nematodes exposed to NA in presence (purple) or absence of BHA (blue) compared with BHA-treated worms. **m** Lifespan analyses of wt nematodes exposed to 1 mM NAC (grey). **n** Lifespan analyses of wt nematodes exposed to NA in presence (purple) or absence of NAC (blue) compared to NAC-treated worms. **o** Lifespan analyses of wt nematodes exposed to MNA in presence (purple) or absence of NAC (red) compared to NAC-treated worms.

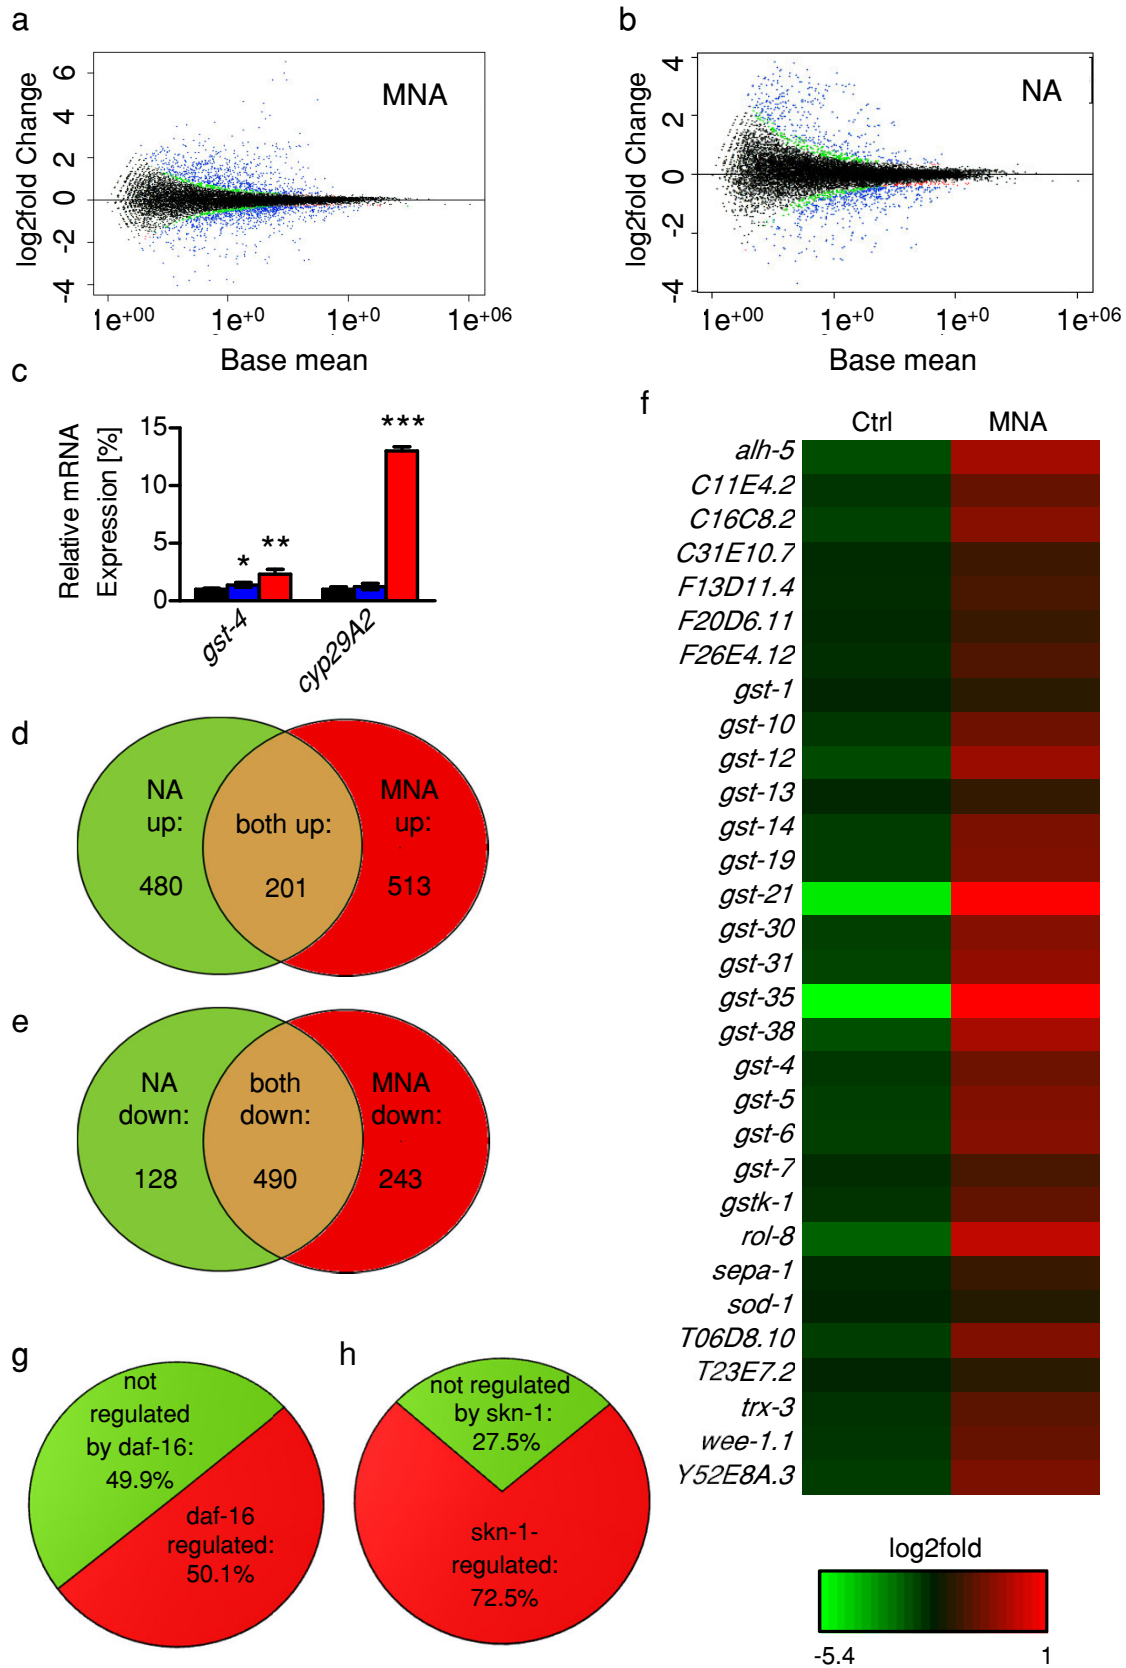



**Suppl. Fig. 5: Transcriptome analyses identify DAF-16/FOXO and SKN-1/NRF-2 signaling as molecular pathways for MNA-mediated lifespan extension**

**a** Differentially expressed genes as quantified by deep sequencing analysis after 48 hr treatment of wild-type nematodes with 1  $\mu$ M 1-methylnicotinamide (MNA) in comparison with untreated nematodes. Black dots indicate no differential regulation, red and green dots indicate regulation according to one statistical method only. Blue dots indicate regulation according to both statistical methods (used for further analysis). **b** Differentially expressed genes after 48 hr treatment of wt nematodes with 1 mM nicotinic acid (NA). **c** Relative mRNA levels of *gst-4* and *cyp29A2* followed 48 hr treatment of wt nematodes with NA and MNA. Data represent mean values with standard deviation of 3 independent experiments. **d** and **e** Similar regulated genes by NA and MNA identified by Venn analyses, **d** upregulated and **e** downregulated genes. **f** Regulation of genes associated with oxidative stress response after 48 hr MNA treatment in comparison with untreated control (cutoff for two sets,  $p = 0.05$ ). **g** and **h** Promoter analyses identified 50.1 and 72.5 per cent of all differentially expressed genes after MNA treatment as under transcriptional control of **g** DAF-16 and **h** SKN-1, respectively.

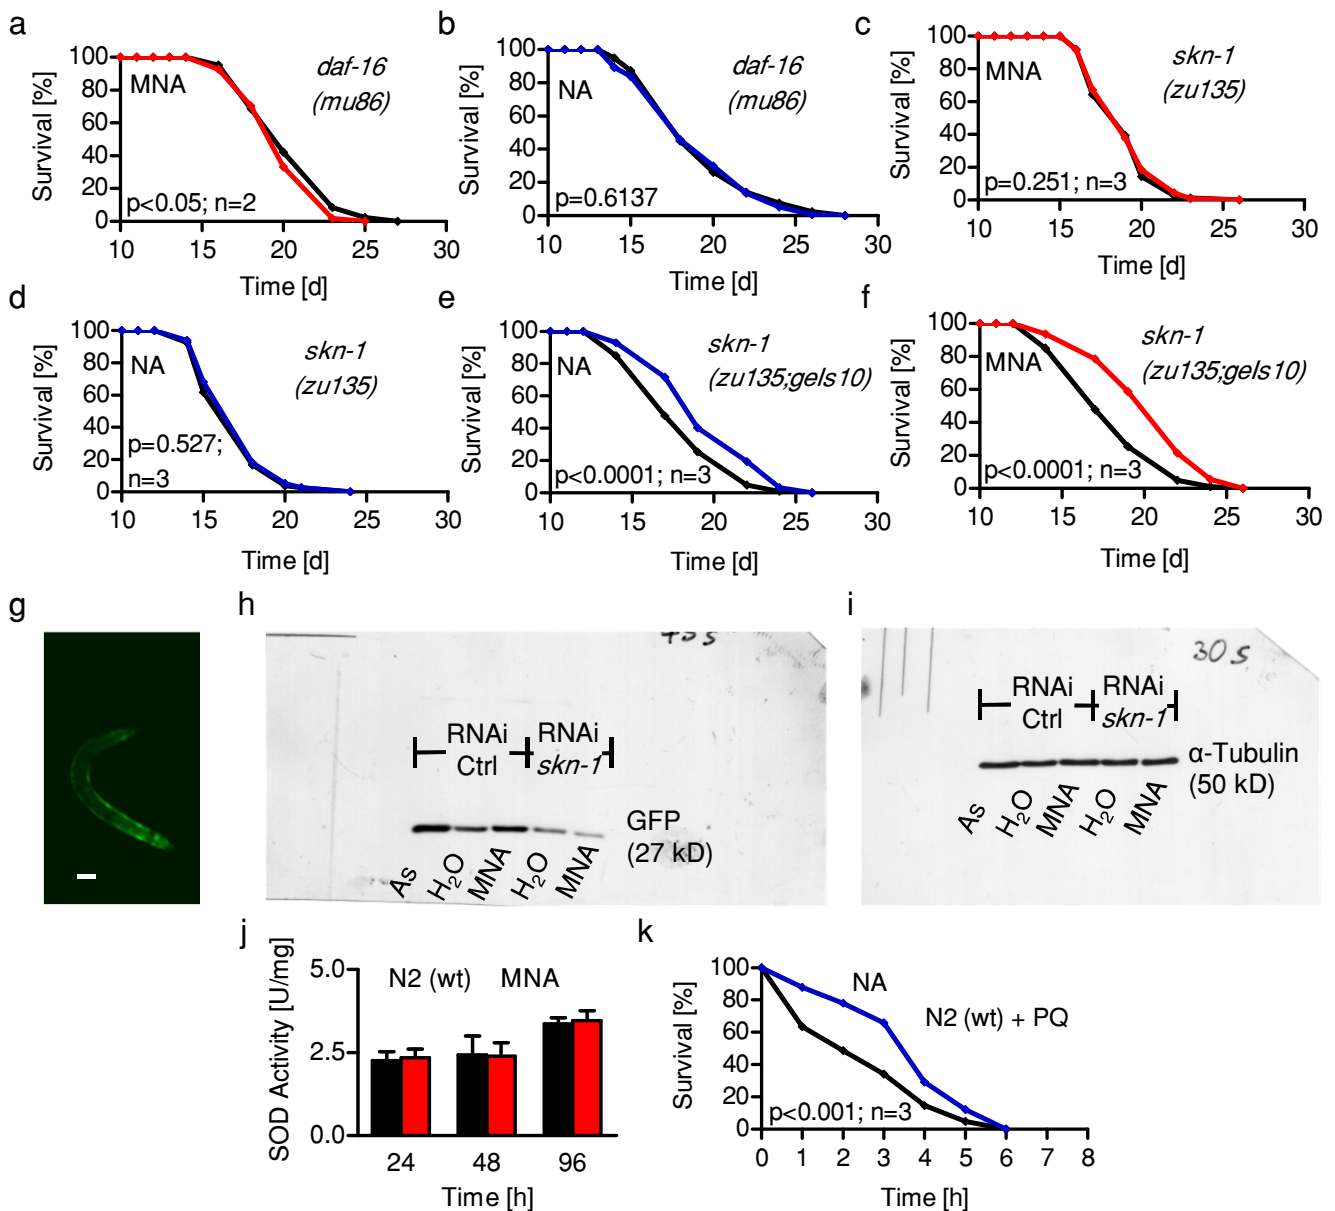

**Suppl. Fig. 6: Additional findings on downstream signaling and parameters of stress resistance**

**a** Lifespan analyses of *daf-16(mu86)* nematodes exposed to 1  $\mu$ M 1-methylnicotinamide (MNA; red) compared with untreated worms (black). **b** Lifespan analyses of *daf-16(mu86)* nematodes exposed to 1 mM nicotinic acid (NA; blue). **c** Lifespan analyses of *skn-1(zu135)* nematodes exposed to 1  $\mu$ M MNA. **d** Lifespan analyses of *skn-1(zu135)* nematodes exposed to 1 mM NA (blue). **e** Lifespan analyses of intestine-reconstituted *skn-1(zu135;gels10)* nematodes exposed to 1 mM NA. **f** Lifespan analyses of intestine-reconstituted *skn-1(zu135;gels10)* nematodes exposed to 1  $\mu$ M MNA. **g** Fluorescent microphotograph of untreated *gst-4::GFP* nematodes. Scale bar, 100  $\mu$ m. **h** and **i** Western Blot against GFP (**h**) as a surrogate marker of GST-4 protein expression in *gst-4::GFP* nematodes and  $\alpha$ -tubulin (**i**) in the presence or absence of RNAi against *skn-1* after 48 hr MNA treatment compared with untreated nematodes. 48 hr arsenite (As) treatment acts as positive control. **j** Activity of superoxide dismutase in wild-type (wt) nematodes exposed to 1  $\mu$ M MNA (red bars) in comparison with untreated nematodes (black bars) at different time points. Data represent mean values with standard deviation of 3 independent experiments. **k** Survival of wt nematodes in liquid medium containing 50 mM Paraquat after 7 days NA (blue) exposure in comparison with untreated nematodes (black). Data were expressed as mean values of 2 independent experiments and 50 examined nematodes/condition each.

Supplemental Table 1: Results and statistical analyses of *C. elegans* lifespan assays

| Strain, RNAi, Substance, Solvent                   | Maximum Life Span [d]<br>[+/- SEM] <sup>1</sup> | Mean Life Span [d]<br>[+/- SEM] | P-Value<br>(vs. control,<br>see footnotes) | Number of<br>Experiments<br>[n] | Number of<br>Nematodes<br>[n] |
|----------------------------------------------------|-------------------------------------------------|---------------------------------|--------------------------------------------|---------------------------------|-------------------------------|
| N2 H <sub>2</sub> O                                | 25.0 +/-1.4                                     | 22.57 +/-0.3                    |                                            | 6                               | 565                           |
| N2 NA/H <sub>2</sub> O                             | 26.3 +/-1.7                                     | 24.04 +/-0.3                    | <0.0001 <sup>a</sup>                       | 6                               | 600                           |
| N2 H <sub>2</sub> O                                | 24.3 +/-0.5                                     | 22.59 +/-0.1                    |                                            | 6                               | 655                           |
| N2 NAM/H <sub>2</sub> O                            | 25.7 +/-0.5                                     | 24.02 +/-0.2                    | <0.0001 <sup>a</sup>                       | 6                               | 513                           |
| N2 NAM high/H <sub>2</sub> O                       | 24.0 +/-0.9                                     | 20.90 +/-0.2                    | <0.0001 <sup>a</sup>                       | 3                               | 337                           |
| N2 H <sub>2</sub> O                                | 24.3 +/-1.2                                     | 22.05 +/-0.2                    |                                            | 6                               | 535                           |
| N2 MNA/H <sub>2</sub> O                            | 27.0 +/-1.4                                     | 23.75 +/-0.2                    | <0.0001 <sup>a</sup>                       | 6                               | 516                           |
| N2 MNA high/H <sub>2</sub> O                       | 22.0 +/-0.6                                     | 20.09 +/-0.2                    | <0.0001 <sup>a</sup>                       | 3                               | 331                           |
| N2 H <sub>2</sub> O                                | 24.0 +/-0.5                                     | 22.63 +/-0.2                    |                                            | 3                               | 370                           |
| N2 PYR-2/H <sub>2</sub> O                          | 24.0 +/-0.9                                     | 22.93 +/-0.1                    | n.s. <sup>a</sup>                          | 3                               | 341                           |
| N2 PYR-4/H <sub>2</sub> O                          | 24.0 +/-1.2                                     | 22.61 +/-0.3                    | n.s. <sup>a</sup>                          | 3                               | 353                           |
| N2 ( <i>gad-3</i> RNAi) H <sub>2</sub> O           | 26.3 +/-0.9                                     | 23.02 +/-0.3                    |                                            | 3                               | 257                           |
| N2 ( <i>gad-3</i> RNAi) MNA/H <sub>2</sub> O       | 23.0 +/-0.5                                     | 22.17 +/-0.2                    | 0.0042 <sup>b</sup>                        | 3                               | 224                           |
| N2 DMSO/H <sub>2</sub> O                           | 24.7 +/-0.7                                     | 22.54 +/-0.2                    | n.s. <sup>a</sup>                          | 3                               | 311                           |
| N2 IsoVan/DMSO/H <sub>2</sub> O                    | 25.1 +/-0.8                                     | 22.49 +/-0.2                    | n.s. <sup>c</sup>                          | 3                               | 268                           |
| N2 IsoVan/DMSO/MNA/H <sub>2</sub> O                | 25.0 +/-0.5                                     | 22.08 +/-0.2                    | n.s. <sup>c</sup>                          | 3                               | 250                           |
| N2 DMSO                                            | 25.0 +/-0.2                                     | 21.97 +/-0.2                    | n.s. <sup>a</sup>                          | 3                               | 396                           |
| N2 vanillin/DMSO                                   | 26.3 +/-0.6                                     | 23.16 +/-0.3                    | <0.0001 <sup>d</sup>                       | 2                               | 232                           |
| N2 vanillin high/DMSO                              | 24.5 +/-0.3                                     | 21.20 +/-0.2                    | <0.0001 <sup>d</sup>                       | 2                               | 168                           |
| N2 DMSO                                            | 25.0 +/-1.0                                     | 22.51 +/-0.2                    | n.s. <sup>a</sup>                          | 3                               | 323                           |
| N2 DMSO/ H <sub>2</sub> O                          | 25.3 +/-1.5                                     | 22.42 +/-0.3                    | n.s. <sup>a</sup>                          | 3                               | 301                           |
| N2 BHA/DMSO/ H <sub>2</sub> O                      | 25.5 +/-0.7                                     | 22.51 +/-0.3                    | n.s. <sup>a</sup>                          | 3                               | 330                           |
| N2 NA/H <sub>2</sub> O/BHA/DMSO                    | 25.0 +/-0.0                                     | 22.68 +/-0.2                    | n.s. <sup>e</sup>                          | 3                               | 318                           |
| N2 MNA/H <sub>2</sub> O/BHA/DMSO                   | 24.5 +/-0.5                                     | 21.67 +/-0.2                    | 0.0074 <sup>e</sup>                        | 3                               | 314                           |
| N2 NAC/H <sub>2</sub> O                            | 24.5 +/-1.5                                     | 22.23 +/-0.2                    | n.s. <sup>a</sup>                          | 5                               | 455                           |
| N2 NA/NAC/H <sub>2</sub> O                         | 23.0 +/-0.6                                     | 22.01 +/-0.3                    | n.s. <sup>f</sup>                          | 3                               | 279                           |
| N2 MNA/NAC/H <sub>2</sub> O                        | 24.5 +/-1.5                                     | 22.08 +/-0.2                    | n.s. <sup>f</sup>                          | 5                               | 513                           |
| <i>sir-2.1(ok434)</i> (MIR14) H <sub>2</sub> O     | 25.0 +/-2.0                                     | 22.34 +/-0.4                    |                                            | 3                               | 274                           |
| <i>sir-2.1(ok434)</i> (MIR14) NA/H <sub>2</sub> O  | 25.0 +/-0.0                                     | 22.01 +/-0.3                    | n.s. <sup>g</sup>                          | 3                               | 249                           |
| <i>sir-2.1(ok434)</i> (MIR14) NAM/H <sub>2</sub> O | 28.0 +/-1.0                                     | 24.44 +/-0.3                    | <0.0001 <sup>g</sup>                       | 3                               | 240                           |
| <i>sir-2.1(ok434)</i> (MIR14) MNA/H <sub>2</sub> O | 27.5 +/-1.5                                     | 24.06 +/-0.3                    | <0.0001 <sup>g</sup>                       | 3                               | 226                           |
| N2 <i>rol-6</i> H <sub>2</sub> O                   | 24.3 +/-1.0                                     | 21.79 +/-0.4                    |                                            | 2                               | 174                           |
| N2 <i>rol-6</i> NA/H <sub>2</sub> O                | 26.0 +/-0.5                                     | 24.30 +/-0.6                    | <0.0001 <sup>h</sup>                       | 2                               | 181                           |
| <i>sir-2.1</i> OE (GA468) H <sub>2</sub> O         | 28.5 +/-1.5                                     | 24.25 +/-0.5                    | <0.0001 <sup>h</sup>                       | 2                               | 184                           |
| <i>sir-2.1</i> OE (GA468) NA/H <sub>2</sub> O      | 30.0 +/-1.0                                     | 27.46 +/-0.5                    | <0.0001 <sup>i</sup>                       | 2                               | 166                           |
| <i>sir-2.1</i> OE Ctrl (LG390) H <sub>2</sub> O    | 26.5 +/-0.5                                     | 24.09 +/-0.4                    |                                            | 2                               | 191                           |
| <i>sir-2.1</i> OE Ctrl (LG390) NA/H <sub>2</sub> O | 29.0 +/-1.0                                     | 26.35 +/-0.4                    | <0.0001 <sup>j</sup>                       | 2                               | 204                           |
| <i>sir-2.1</i> OE (LG389) H <sub>2</sub> O         | 27.5 +/-1.5                                     | 25.83 +/-0.3                    | 0.0019 <sup>j</sup>                        | 2                               | 170                           |

## Continuation of Supplemental Table 1

| Strain, RNAi, Substance, Solvent                          | Maximum Life Span [d]<br>[+/- SEM] <sup>1</sup> | Mean Life Span [d]<br>[+/- SEM] | P-Value<br>(vs. control,<br>see footnotes) | Number of<br>Experiments<br>[n] | Number of<br>Nematodes<br>[n] |
|-----------------------------------------------------------|-------------------------------------------------|---------------------------------|--------------------------------------------|---------------------------------|-------------------------------|
| <i>sir-2.1</i> OE (LG389) NA/H <sub>2</sub> O             | 32.0 +/-2.0                                     | 27.63 +/-0.4                    | 0.0002 <sup>k</sup>                        | 2                               | 173                           |
| <i>sir-2.1</i> OE (GA468)                                 | 26.0 +/-1.0                                     | 23.08 +/-0.3                    |                                            | 2                               | 168                           |
| <i>sir-2.1</i> OE (GA468) ( <i>gad-3</i> RNAi)            | 26.0 +/-1.0                                     | 23.36 +/-0.3                    | n.s. <sup>l</sup>                          | 2                               | 153                           |
| <i>anmt-1</i> (gk457) (MIR16) H <sub>2</sub> O            | 25.0 +/-1.4                                     | 22.76 +/-0.1                    |                                            | 6                               | 667                           |
| <i>anmt-1</i> (gk457) (MIR16) NA/H <sub>2</sub> O         | 24.7 +/-0.9                                     | 22.77 +/-0.1                    | n.s. <sup>m</sup>                          | 6                               | 695                           |
| <i>anmt-1</i> (gk457) (MIR16) NAM/H <sub>2</sub> O        | 24.0 +/-0.5                                     | 23.07 +/-0.1                    | n.s. <sup>m</sup>                          | 4                               | 465                           |
| <i>anmt-1</i> (gk457) (MIR16) MNA/H <sub>2</sub> O        | 26.0 +/-1.0                                     | 23.94 +/-0.1                    | <0.0001 <sup>m</sup>                       | 6                               | 615                           |
| N2 <i>rol-6</i>                                           | 25.0 +/-0.0                                     | 21.91 +/-0.2                    |                                            | 4                               | 419                           |
| <i>sir-2.1</i> OE/ <i>anmt-1</i> (gk457) (MIR22)          | 23.0 +/-1.0                                     | 20.81 +/-0.3                    | 0.0017 <sup>n</sup>                        | 3                               | 252                           |
| N2                                                        | 24.0 +/-1.0                                     | 21.85 +/-0.1                    |                                            | 4                               | 401                           |
| <i>anmt-1</i> OE::GFP (MIR8)                              | 25.3 +/-0.5                                     | 23.32 +/-0.2                    | <0.0001 <sup>o</sup>                       | 6                               | 557                           |
| <i>anmt-1</i> OE::HA tag (MIR12)                          | 27.0 +/-0.0                                     | 25.01 +/-0.2                    | <0.0001 <sup>o</sup>                       | 3                               | 306                           |
| <i>daf-16</i> ( <i>mu86</i> ) H <sub>2</sub> O            | 22.5 +/-0.5                                     | 20.31 +/-0.2                    |                                            | 4                               | 321                           |
| <i>daf-16</i> ( <i>mu86</i> ) NA/H <sub>2</sub> O         | 22.0 +/-0.0                                     | 19.30 +/-0.3                    | n.s. <sup>p</sup>                          | 2                               | 151                           |
| <i>daf-16</i> ( <i>mu86</i> ) MNA/H <sub>2</sub> O        | 22.5 +/-0.5                                     | 20.71 +/-0.2                    | 0.048 <sup>p</sup>                         | 2                               | 136                           |
| <i>skn-1</i> ( <i>zu135</i> ) H <sub>2</sub> O            | 19.5 +/-1.5                                     | 18.60 +/-0.2                    |                                            | 3                               | 338                           |
| <i>skn-1</i> ( <i>zu135</i> ) NA/H <sub>2</sub> O         | 19.5 +/-1.0                                     | 18.51 +/-0.1                    | n.s. <sup>q</sup>                          | 3                               | 316                           |
| <i>skn-1</i> ( <i>zu135</i> ) MNA/H <sub>2</sub> O        | 20.0 +/-0.0                                     | 19.05 +/-0.1                    | n.s. <sup>q</sup>                          | 3                               | 213                           |
| <i>skn-1</i> ( <i>zu135;gels10</i> ) H <sub>2</sub> O     | 22.0 +/-0.5                                     | 17.75 +/-0.2                    |                                            | 3                               | 450                           |
| <i>skn-1</i> ( <i>zu135;gels10</i> ) NA/H <sub>2</sub> O  | 22.5 +/-1.5                                     | 19.79 +/-0.2                    | <0.0001 <sup>r</sup>                       | 3                               | 389                           |
| <i>skn-1</i> ( <i>zu135;gels10</i> ) MNA/H <sub>2</sub> O | 22.0 +/-0.0                                     | 19.43 +/-0.2                    | <0.0001 <sup>r</sup>                       | 3                               | 366                           |

<sup>1</sup> 75% quantile

**Controls:** <sup>a</sup> N<sub>2</sub> H<sub>2</sub>O, <sup>b</sup> N2 (*gad-3* RNAi) H<sub>2</sub>O, <sup>c</sup> N2 DMSO/H<sub>2</sub>O, <sup>d</sup> N2 DMSO, <sup>e</sup> N2 BHA/DMSO/H<sub>2</sub>O, <sup>f</sup> N2 NAC/H<sub>2</sub>O, <sup>g</sup> *sir-2.1(ok434)* H<sub>2</sub>O, <sup>h</sup> N2 *rol-6* H<sub>2</sub>O, <sup>i</sup> *sir-2.1* OE (GA468) H<sub>2</sub>O, <sup>j</sup> *sir-2.1* OE Ctrl (LG390) H<sub>2</sub>O, <sup>k</sup> *sir-2.1* OE (LG389) H<sub>2</sub>O, <sup>l</sup> *sir-2.1* OE (GA468), <sup>m</sup> *ANMT-1(gk457)* H<sub>2</sub>O, <sup>n</sup> N2 *rol-6*, <sup>o</sup> N<sub>2</sub>, <sup>p</sup> *daf-16(mu86)* H<sub>2</sub>O, <sup>q</sup> *skn-1(zu135)* H<sub>2</sub>O, <sup>r</sup> *skn-1(zu135;gels10)* H<sub>2</sub>O

**Supplementary Table 2: Selection of functional categories affiliated with MNA-upregulated genes**

| <b>Category</b>                                      | <b>Hits</b> | <b>P-value</b> |
|------------------------------------------------------|-------------|----------------|
| catalase reaction                                    | 12          | <0.0001        |
| cellular sensing and response to external stimulus   | 159         | <0.0001        |
| chemoperception and response                         | 139         | <0.0001        |
| defense related proteins                             | 127         | <0.0001        |
| detoxification by modification                       | 30          | <0.0001        |
| detoxification involving cytochrome P450             | 13          | <0.0001        |
| disease, virulence and defense                       | 150         | <0.0001        |
| glutathione conjugation reaction                     | 19          | <0.0001        |
| inflammatory response                                | 110         | <0.0001        |
| lipid, fatty acid and isoprenoid metabolism          | 180         | <0.0001        |
| metabolism of thioredoxin, glutaredoxin, glutathione | 16          | <0.0001        |
| oxidation of fatty acids                             | 29          | <0.0001        |
| oxidative stress response                            | 31          | <0.0001        |
| oxygen and radical detoxification                    | 33          | <0.0001        |
| secondary metabolism                                 | 95          | <0.0001        |
| stress response                                      | 150         | <0.0001        |
| DNA repair                                           | 7           | <0.0005        |
| lipid/fatty acid transport                           | 29          | <0.0006        |
| chemical agent resistance                            | 14          | <0.008         |
| DNA damage response                                  | 2           | <0.03          |
